# Supplementary material for: Interleukin-34 Limits the Therapeutic Effects of Immune Checkpoint Blockade
Source: PubMed Central journal article supplement — iScience. 2020 Sep 19;23(10):101584. doi: 10.1016/j.isci.2020.101584 (PMC7648133; doi:10.1016/j.isci.2020.101584), 2020-09-19
Supplement: mmc1.pdf [file mmc1.pdf]

iScience, Volume 23

## **Supplemental Information**

### **Interleukin-34 Limits the Therapeutic Effects of Immune Checkpoint Blockade**

**Naoki Hama, Takuto Kobayashi, Nanumi Han, Fumihito Kitagawa, Nabeel Kajihara, Ryo Otsuka, Haruka Wada, Hee-kyung Lee, Hwanseok Rhee, Yoshinori Hasegawa, Hideo Yagita, Muhammad Baghdadi, and Ken-ichiro Seino**

## 1 **Transparent Methods**

### 2 **Cell lines**

3 The ovarian cancer cell line OV2944-HM-1 (HM-1) was purchased from the Japanese  
4 Collection of Research Bioresources. The colon cancer cell line CT26 used in this study  
5 was kindly provided by Dr. Hidemitsu Kitamura, Hokkaido University. The breast cancer  
6 cell line 4T1 was purchased from American Type Culture Collection. HM-1 cell line was  
7 maintained in  $\alpha$ MEM (Fujifilm Wako Pure Chemical Industries). CT26 and 4T1 cell lines  
8 were maintained in RPMI-1640 (Fujifilm Wako Pure Chemical Industries). All culture  
9 media were supplemented with 10% fetal bovine serum (Sigma Aldrich), 1%  
10 Penicillin/Streptomycin (Nacalai Tesque), and 1% Non-Essential Amino Acid (Nacalai  
11 Tesque). Cells were maintained in a 5% CO<sub>2</sub>/air environment at 37°C.

12

### 13 **Mice and *in vivo* assay**

14 Six to eight-week-old female B6C3F1 and BALB/c mice were purchased from Japan SLC,  
15 Inc. The mice were maintained under specific pathogen-free conditions in the animal  
16 facility at Hokkaido University. For *in vivo* assay,  $2 \times 10^5$  tumor cells were inoculated s.c.  
17 into the right flank of syngeneic female mice. Antibody treatment (anti-PD-1 (RMP1-14),  
18 250  $\mu$ g/mouse; CTLA-4 (UC10-4F10), 250  $\mu$ g/mouse; or IL-34 (C054-35), 200  $\mu$ g/mouse

19 was started when tumor size reached 5 mm in diameter. Anti-PD-1 and anti-CTLA-4  
20 antibodies were kindly provided by Dr. Hideo Yagita (Juntendo University). Anti-IL-34  
21 antibody was purchased from BioLegend. Detailed information about antibodies is  
22 described in Supplementary Table 1. All animal procedures were approved by the  
23 Hokkaido University Animal Care Committee (Approval number: 14-0171).

24

### 25 **Generation of *Il34* knockout and *Il34* overexpression cell lines**

26 *Il34*<sup>KO</sup> cell line was generated by using IL-34 CRISPR/Cas9 KO Plasmid (m) (Santa Cruz  
27 Biotechnology, Inc.). The plasmids were transfected by using *TransIT-X2* (Mirus) or Neon<sup>®</sup>  
28 Transfection system (Thermo Fisher Scientific). Cells were selected by GFP expression  
29 48 hours after transfection. For the generation of *Il34* overexpression CT26 cell line,  
30 mouse *Il34* coding sequence was cloned into pLenti-EF1a-C-Myc-DDK-IRES-Puro vector  
31 (Origene). Lenti-X293T cells were transfected with lentiviral vector and two packaging  
32 plasmids pCMV-VSV-G-RSV-Rev and pCAG-HIVgp using *TransIT-X2*. The complex was  
33 added in HEK293T cells and incubated 3 days. After collection of HEK293T medium,  
34 CT26 was cultured with 1:1 mixture of HEK293T medium and fresh medium, following  
35 selection by puromycin.

36

37 **Quantitative PCR analysis**

38 Total RNA was extracted using TRIsure reagent (Bioline). cDNA was synthesized using  
39 ReverTra Ace<sup>®</sup> qPCR RT Master Mix (Toyobo). Quantitative PCR was performed on cDNA  
40 using KAPA SYBR<sup>®</sup> FAST qPCR Master Mix (2X) ABI Prism<sup>®</sup> (Kapa Biosystems) on a  
41 StepOnePlus Real-Time PCR System (Thermo Fisher Scientific). The primers are listed  
42 in Supplementary Table 2.

43

44 **Cell viability assay**

45 To assess cell viability, MTT assay was performed using MTT Cell count kit (Nacalai  
46 Tesque). Absorbance at a test wavelength of 570 nm and a reference wavelength of 650  
47 nm was measured by using a Multiskan FC (Thermo Fisher Scientific). Cell proliferation  
48 was observed up to 4 days.

49

50 **Enzyme-linked immunosorbent assay (ELISA)**

51 The production of IL-34 in cell lines was measured with ELISA. Culture supernatants were  
52 collected at 48 h after seeding the cells at a density of  $1 \times 10^6$  in 6-well plate. The IL-34  
53 contents was measured with LEGEND MAX Mouse IL-34 ELISA kit with Pre-Coated  
54 Plates (Biolegend).

55

56 **Isolation of tumor-infiltrating immune cells from solid tumor**

57 Isolation of tumor-infiltrating immune cells from solid tumors was performed by using BD  
58 Horizon™ Dri Tumor & Tissue (Becton, Dickinson, and Company). The recovered tumor-  
59 infiltrating cells were used as samples for flow cytometry or RNA extraction.

60

61 **Flow cytometry**

62 Cells were washed and blocked with FcR Blocking Reagent (TONBO biosciences) and  
63 stained with 4',6-diamidino-2-phenylindole (DAPI, Cayman Chemical Company) and the  
64 antibodies against following molecules; CD3ε, CD4, CD8α, F4/80, CD11b, CD11c, CD45,  
65 CD115, IA-IE (MHC classII), iNOS, Arginase 1 and PD-L1 (BioLegend). Data were  
66 acquired using BD FACSCanto II, BD FACSAria, or BD FACSCelesta flow cytometer, and  
67 analyzed using FlowJo software. Detailed information about antibodies is described in  
68 Supplementary Table 1.

69

70 **Next-generation sequencing and data analysis**

71 Total RNA was extracted using PureLink™ RNA Mini Kit (Life Technologies). Next-  
72 generation sequencing was performed at Kazusa DNA Research Institute (illumina HiSeq

73 2500). The quality and concentration of the RNA was verified with Agilent 2100  
74 Bioanalyzer and Quantus Fluorometer (Promega), respectively. All the samples showed  
75 RIN values > 8. Sequencing libraries were prepared using Agilent SureSelect Strand-  
76 Specific RNA Library Prep for Illumina according to the manufacturer's instructions. Briefly,  
77 poly-A RNA was purified from 300 ng total RNA per sample using oligo dT magnetic beads.  
78 The libraries were PCR amplified for 13 cycles and purified with AMPure XP beads.  
79 Sequencing of the libraries was conducted on the Illumina HiSeq2500 system performing  
80 paired-end 100 bp reads. The reads were mapped to mouse reference genome mm10  
81 with Tophat (v2.1.0), and calculated FPKM (fragments per kilobase of exon per million  
82 reads mapped) value with cufflinks (v2.2.1). The FPKM values were normalized by CD45,  
83 and shown as global z-score.

84

### 85 **Immunohistochemistry staining**

86 For DAB staining, immunohistochemistry staining was performed on paraffin-embedded  
87 tumor tissue sections. PD-L1 was stained using DAB (Dojindo) followed by hematoxylin  
88 counterstaining (Fujifilm Wako Pure Chemical Industries). PD-L1 staining was kindly  
89 performed by Dr. Yutaka Hatanaka, Research Division of Genome Companion  
90 Diagnostics, Hokkaido University Hospital. For multiple immunofluorescent staining, Opal

91 4-color fluorescent IHC kit (Perkin-Elmer) was used. Tumor sections were objectively  
92 judged by two independent researchers at 600× magnification for each section. More than  
93 6 tumor areas in each section were randomly selected for evaluation. FV1000 OLYMPUS  
94 software was used for quantification of immunofluorescent staining. Detailed information  
95 about antibodies is described in Supplementary Table 1.

96

### 97 **PDX model**

98 PDX model was performed at DNA Link, Inc. Firstly, HuNSG mice were generated as  
99 previously reported by The Jackson Laboratory (Shultz et al., 2005). In brief, human fetal  
100 liver CD34<sup>+</sup>-purified HSC were purchased from Stem Express and intravenously injected  
101 into three-week-old female NSG mice (10<sup>5</sup> cells/mouse), 4h post-140 cGy total body  
102 irradiation using the RS-2000 irradiator (Rad Source). The engraftment levels of human  
103 CD45<sup>+</sup> cells were determined 12 weeks post-HSC transplantation by flow cytometric  
104 quantification of peripheral blood. HuNSG mice that had over 25% of human CD45<sup>+</sup> cells  
105 in the peripheral blood were considered as engrafted and humanized. PDX models were  
106 generated using tumor tissues from patients who underwent surgery as the primary  
107 treatment strategy for lung cancer at Samsung Medical Center. Twelve weeks post-human  
108 HSC transplantation, 30-40 μl finely minced tumors were injected s.c. into the left flank of

109 HuNSG mice. Treatment was started when the tumor volumes reached 70-120 mm<sup>3</sup>.  
110 Treatment with anti-human IL-34 (BioLegend; 250 µg per injection, 3 times a week for 4  
111 weeks), anti-human PD-1 (Selleckchem; 10 mg/kg for the first dose, followed by 5 mg/kg  
112 dose every 5 days), antibodies combination, or saline was administered intraperitoneally.  
113 Vehicle control saline (Sigma Aldrich) was administered 3 times per week until the  
114 endpoint. Tumor size was measured by caliper twice a week, and volumes (mm<sup>3</sup>) were  
115 calculated by  $(\text{length} \times \text{width}^2)/2$ .

116 For histological analysis, tumor tissues were fixed with 4% formaldehyde, embedded  
117 with paraffin and sections were stained with hematoxylin and eosin.

118 All animal experiments were performed under the guidelines approved by the  
119 Institutional Animal Care and Use Committee of Seoul National University Biomedical  
120 Research Institute.

121

## 122 **Statistics**

123 Statistical analysis was performed with JMP<sup>®</sup> 14 (SAS Institute Inc.). Significance was  
124 determined by Student's *t*-test, Tukey's multiple comparison test, or Steel-Dwass  
125 nonparametric multiple comparison test. p-Value was considered statistically significant  
126 when  $< 0.05$ .



127 **Supplemental Reference**

128 Shultz, L.D., Lyons, B.L., Burzenski, L.M., Gott, B., Chen, X., Chaleff, S., Kotb, M.,

129 Gillies, S.D., King, M., Mangada, J., et al. (2005). Human Lymphoid and Myeloid Cell

130 Development in NOD/LtSz- *scid* *IL2R*  $\gamma$  <sup>null</sup> Mice Engrafted with Mobilized Human

131 Hemopoietic Stem Cells. *J. Immunol.* *174*, 6477–6489.

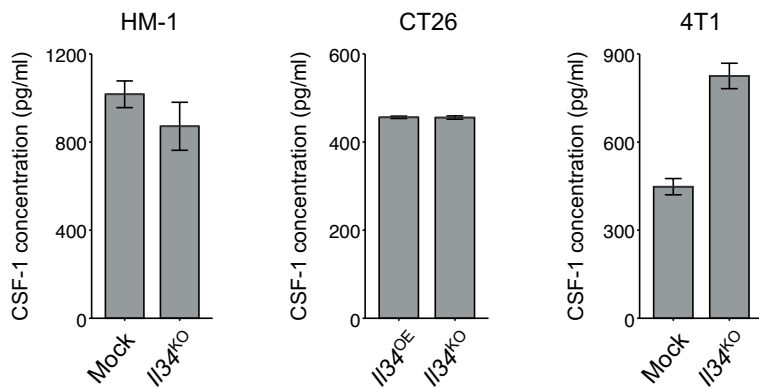

**Figure S1 : The expression of CSF-1 from various murine cancer cell lines. Related to Figure 1, 2.**

CSF-1 concentration in supernatants of HM-1, CT26 and 4T1 cell lines (n=3/cell line).

Data represent mean  $\pm$  SEM.

Figure S1

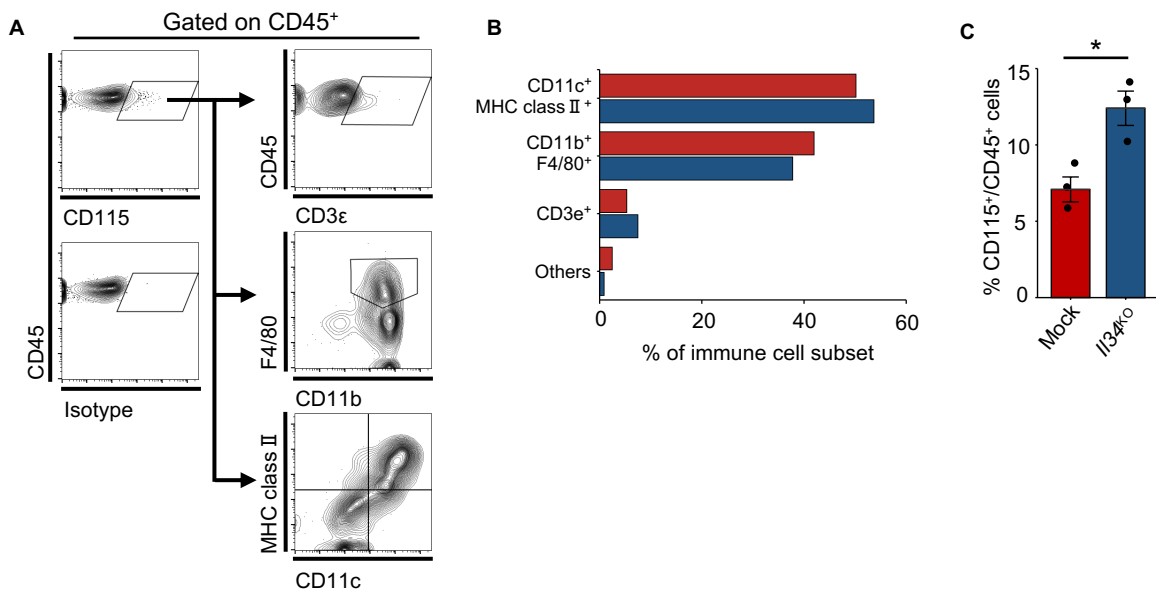

**Figure S2 : Identification of the immune cell subset expressing CD115 in mock-HM-1 and I/34<sup>KO</sup>-HM-1 tumors. Related to Figure 1.**

(A) Representative flow cytometry profiles showing CD115<sup>+</sup> cells within tumor-infiltrating CD45<sup>+</sup> cells in HM-1 tumor.

(B) Bar graph shows the cell type expressing CD115 within tumor-infiltrating CD45<sup>+</sup> cells (n=3/group).

(C) Bar graph represent the frequency of CD115<sup>+</sup> cells within tumor-infiltrating CD45<sup>+</sup> cells in mock- or I/34<sup>KO</sup>-HM-1 tumors (n=3/group). Data represent mean ± SEM. \*p<0.05; two-tailed Student's t-test.

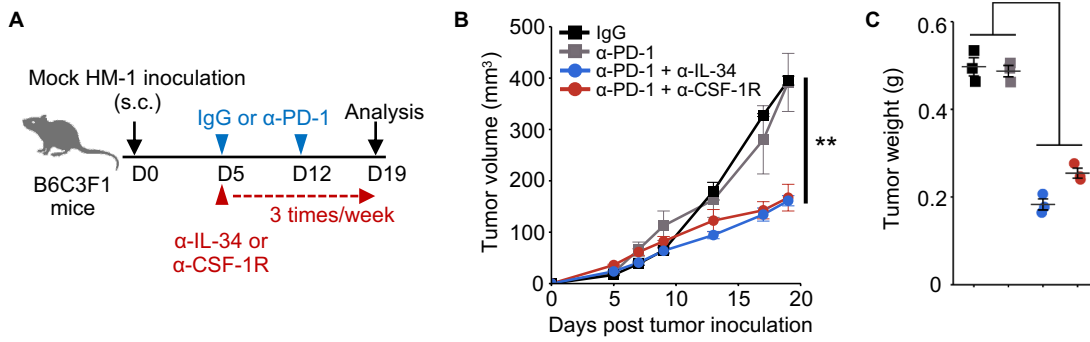

**Figure S3 : IL-34 blockade equally enhanced anti-tumor efficacy of α-PD-1 treatment comparing with CSF-1R blockade in HM-1 model. Related to Figure 1.**

(A) Schematic of the α-PD-1 mAb treatment in combination with α-IL-34 or α-CSF-1R mAb. The timeline shows the procedure of tumor inoculation and antibody treatment.

(B) Mock HM-1 tumor growth in B6C3F1 mice treated with the indicated antibodies (n=3-4/group).

(C) Tumor weight on day 19 after tumor inoculation (n=3-4/group).

Data represent mean ± SEM. \*\*p<0.01; Tukey's multiple comparison test.

| Canonical Pathway                      | p-value  |
|----------------------------------------|----------|
| T cell receptor signaling pathway      | 3.68E-10 |
| Graft-versus-host disease              | 4.47E-10 |
| Antigen processing and presentation    | 9.52E-10 |
| Systemic lupus erythematosus           | 3.84E-09 |
| Allograft rejection                    | 5.42E-09 |
| Asthma                                 | 3.76E-08 |
| Cell adhesion molecules (CAMs)         | 3.86E-08 |
| Hematopoietic cell lineage             | 1.05E-07 |
| Type I diabetes mellitus               | 2.25E-07 |
| Cytokine-cytokine receptor interaction | 2.45E-07 |

(A) The list of gene-set clusters enhanced in *Il34*<sup>KO</sup> CT26 group compared to *Il34*<sup>OE</sup> CT26 group.

(B) Heatmap shows the differentially of gene expression on selected several gene-set clusters.

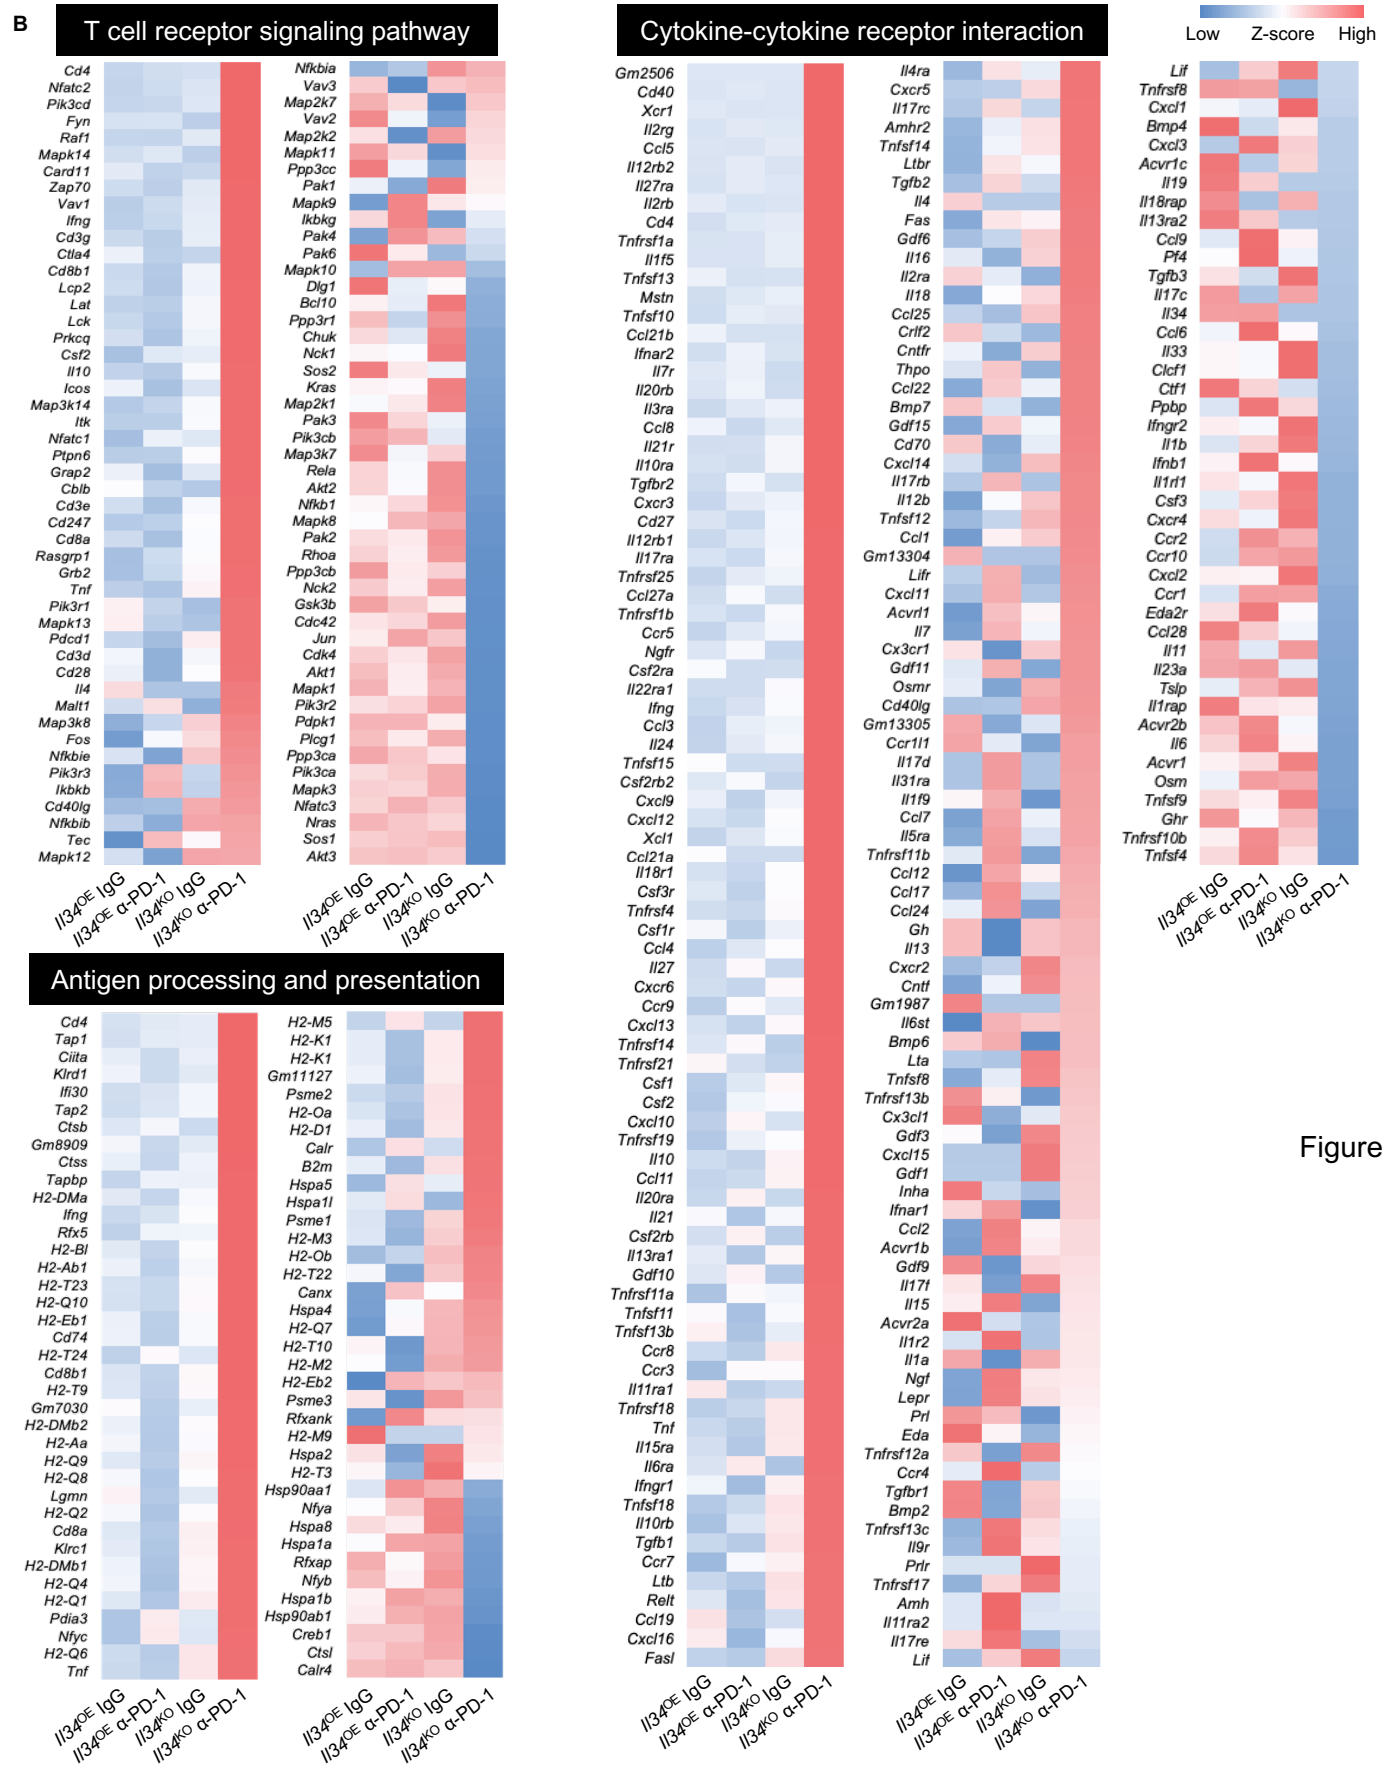

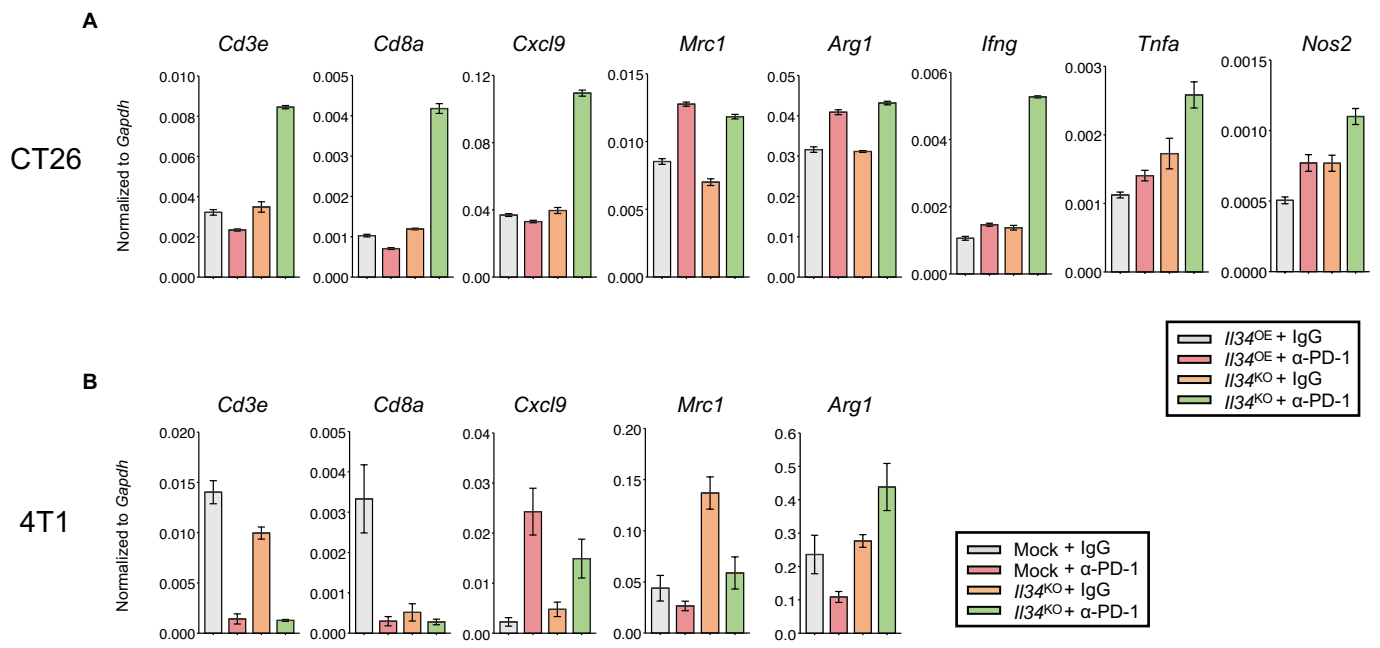

**Figure S5 : qPCR analysis in CT26 and 4T1 tumors. Related to Figure 2.**

(A) Expression of selected genes were evaluated by qPCR analysis in CT26 tumor samples used for NGS analysis (Fig. 2D).

(B) Gene expression displayed in (A) were analyzed by qPCR in 4T1 tumors (n=3/group).

Data represent mean  $\pm$  SEM of technical triplicate.

## Key resources table

| REAGENT & RESOURCE                                       | SOURCE                                              | IDENTIFIER                       |
|----------------------------------------------------------|-----------------------------------------------------|----------------------------------|
| Antibodies                                               |                                                     |                                  |
| Anti-mouse CD3 $\epsilon$ (145-2C11) APC                 | BioLegend                                           | Cat#100236; RRID: AB_2561456     |
| Anti-mouse CD4 (RM4-5) APC-Cy7                           | BioLegend                                           | Cat#00525; RRID: AB_312726       |
| Anti-mouse CD8 $\alpha$ (53-6.7) FITC                    | BioLegend                                           | Cat#00706; RRID: AB_312745       |
| Anti-mouse CD11b (M1/70) FITC                            | BioLegend                                           | Cat#101206; RRID: AB_312789      |
| Anti-mouse CD11c (N418) APC                              | BioLegend                                           | Cat#117309; RRID: AB_313778      |
| Anti-mouse CD45 (30-F11) Pacific blue                    | BioLegend                                           | Cat#103126; RRID: AB_493535      |
| Anti-mouse CD45 (30-F11) FITC                            | BioLegend                                           | Cat#103108; RRID: AB_312973      |
| Anti-mouse CD45 (30-F11) PE                              | BioLegend                                           | Cat#103106; RRID: AB_312971      |
| Anti-mouse CD45 (30-F11) APC                             | BioLegend                                           | Cat#103112; RRID: AB_312977      |
| Anti-mouse CD45 (30-F11) PE-Cy7                          | BioLegend                                           | Cat#103114; RRID: AB_312979      |
| Anti-mouse CD45 (30-F11) APC-Cy7                         | BioLegend                                           | Cat# 103116; RRID: AB_312981     |
| Anti-mouse F4/80 (BM8) APC                               | BioLegend                                           | Cat#123116; RRID: AB_893481      |
| Anti-mouse CD274 (MIH5) APC                              | BioLegend                                           | Cat#124311; RRID: AB_10612935    |
| Anti-mouse CD273 (TY25) PE                               | BioLegend                                           | Cat#107205; RRID: AB_2299418     |
| Anti-mouse CD80 (16-10A1) FITC                           | BioLegend                                           | Cat#104705; RRID: AB_313126      |
| Anti-mouse CD86 (GL-1) FITC                              | BioLegend                                           | Cat#105005; RRID: AB_313148      |
| Anti-mouse CD115 (AFS98) APC                             | BioLegend                                           | Cat#125509; RRID: AB_2085222     |
| Anti-mouse I-A/I-E (M5/114.15.2) FITC                    | BioLegend                                           | Cat#107606; RRID: AB_313321      |
| Anti-mouse iNOS (CXNFT) APC,<br>eBioscience™             | Invitrogen™                                         | Cat#17-5920-80; RRID: AB_2573244 |
| Anti-human/mouse Arginase 1 (A1exF5)<br>PE, eBioscience™ | Invitrogen™                                         | Cat#12-3697-80; RRID: AB_2734839 |
| Purified anti-mouse CD16/CD32 (2.4G2)<br>(Fc Block)      | TONBO bioscience                                    | Cat#70-0161; RRID: AB_2621487    |
| Purified anti-mouse CD45 (30-F11)                        | BioLegend                                           | Cat#10302; RRID: AB_312967       |
| Purified anti-mouse F4/80 (BM8)                          | BioLegend                                           | Cat#123101; RRID: AB_893504      |
| Purified anti-mouse Areginase-1 (D4E3M)                  | CST                                                 | Cat#93668; RRID: AB_2800207      |
| Purified anti-mouse Nos2 (Rabbit<br>polyclonal)          | Abcam                                               | Cat#ab15323; RRID: AB_301857     |
| Purified anti-mouse PD-1 (RMP1-14)                       | Dr. Hideo Yagita<br>(Juntendo University,<br>Tokyo) | N/A                              |

|                                        |                                                     |                                      |
|----------------------------------------|-----------------------------------------------------|--------------------------------------|
| Purified anti-mouse CTLA-4 (UC10-4F10) | Dr. Hideo Yagita<br>(Juntendo University,<br>Tokyo) | N/A                                  |
| Purified anti-mouse IL-34 (C054-35)    | BioLegend                                           | Cat#147202; RRID: AB_2563031         |
| Purified anti-mouse CSF-1R (AFS98)     | Bioxell                                             | Cat#BE0213; RRID: AB_2687699         |
| ChromPure Rat igG, whole molecule      | Jackson Immuno<br>Research<br>LABORATPRIES, INC.    | Cat#012-000-003; RRID:<br>AB_2337136 |
| Purified anti-human IL-34 (1D12)       | Millipore                                           | Cat#MABT493                          |
| Purified anti-human CD274 (E1L3N)      | CST                                                 | Cat#13684; RRID: AB_2687655          |
| Purified anti-human PD-1 (monoclonal)  | Selleckchem                                         | Cat#A2002; RRID: AB_2810223          |
| Purified anti-human IL-34 (E0320E7)    | BioLegend                                           | Cat#361302; RRID: AB_2563033         |

#### Cell Culture Regents

|                                                       |                                           |               |
|-------------------------------------------------------|-------------------------------------------|---------------|
| RPMI-1640with L-Glutamine and Phenol Red              | Fujifilm Wako Pure<br>Chemical Industries | Cat#189-02025 |
| D-MEM (high Glucose) with L-Glutamine and Phenol Red  | Fujifilm Wako Pure<br>Chemical Industries | Cat#044-29765 |
| MEM $\alpha$ with L-Glutamine and Phenol Red          | Fujifilm Wako Pure<br>Chemical Industries | Cat#135-15175 |
| Defined fetal bovine serum                            | Sigma Aldrich                             | Cat#F7524     |
| Penicillin-Streptomycin Mixed Solution (100x)         | Nacali Tesque                             | Cat#26253-84  |
| MEM Non-Essential Amino Acid Solution (100x)          | Nacali Tesque                             | Cat#06344-56  |
| 2.5g/l-Trypsin/1mmol/l-EDTA Solution, with Phenol Red | Nacali Tesque                             | Cat#32777-15  |

#### Critical Commercial Regents

|                                                                |                         |                |
|----------------------------------------------------------------|-------------------------|----------------|
| TransIT-X2 <sup>®</sup> Dynamic Delivery System                | Takara                  | Cat#V6104      |
| LEGEND MAX <sup>™</sup> Mouse IL-34 ELISA Kit                  | BioLegend               | Cat#439107     |
| eBioscience <sup>™</sup> Fixation/Permeabilization Concentrate | Invitrogen <sup>™</sup> | Cat#00-5123-43 |
| eBioscience <sup>™</sup> Fixation/Permeabilization Diluent     | Invitrogen <sup>™</sup> | Cat#00-5223-56 |
| eBioscience <sup>™</sup> Permeabilization Buffer (10X)         | Invitrogen <sup>™</sup> | Cat#00-8333-56 |



|                                                               |               |            |
|---------------------------------------------------------------|---------------|------------|
| BD Horizon™ Dri Tumor & Tissue<br>Dissociation Reagent (TTDR) | BD bioscience | Cat#661563 |
|---------------------------------------------------------------|---------------|------------|

#### Experimental Models: Cell Lines

|             |                                                              |              |
|-------------|--------------------------------------------------------------|--------------|
| OV2944-HM-1 | Japanese Collection of<br>Research Bioresources              | Cat#JCRB1208 |
| CT26        | Dr. Hidemitsu Kitamura<br>(Hokkaido University,<br>Hokkaido) | N/A          |
| 4T1         | ATCC                                                         | Cat#CRL-2539 |

#### Experimental Models: Organisms/Strains

|        |                 |     |
|--------|-----------------|-----|
| B6C3F1 | Japan SLC, Inc. | N/A |
| Balb/c | Japan SLC, Inc. | N/A |

#### Plasmids

|                                  |                                   |               |
|----------------------------------|-----------------------------------|---------------|
| pCAG-VSVG                        | Addgene                           | Cat#8454      |
| pCMV-VSV-G-RSV-Rev               | Addgene                           | Cat#35616     |
| IL-34 CRISPR/Cas9 KO Plasmid (m) | Santa Cruz<br>Biotechnology, Inc. | Cat#sc-429354 |
| pLenti-EF1a-C-Myc-DDK-IRES-Puro  | Origene                           | Cat#PS100085  |

### Primer list for quantitative PCR analysis

| Species | Gene   | Forward (5'-3')       | Reverse (5'-3')         |
|---------|--------|-----------------------|-------------------------|
|         | Gapdh  | TCAAATGGGGTGAGGCCGGT  | TTGCTGACAATCTTGAGTGA    |
|         | Cd3e   | AAGTAATGAGCTGGCTGCGT  | TCGTCACTGTCTAGAGGGCA    |
|         | Cd8a   | GGATTGGACTTCGCCTGTGA  | TGGGACATTTGCAAACACGC    |
|         | Mrc1   | CTCTGTTCAGCTATTGGACGC | TGGCACTCCCAAACATAATTTGA |
|         | lfng   | AAGACAATCAGGCCATCAGCA | AGCGACTCCTTTTCCGCTTC    |
| Mouse   | Tnfa   | TTCTATGGCCCAGACCCTCA  | CTTGGTGGTTTGCTACGACG    |
|         | Nos2   | ACATCGACCCGTCCACAGTAT | CAGAGGGGTAGGCTTGTCTC    |
|         | Arg1   | GTATGACGTGAGAGACCACG  | CTCGCAAGCCAATGTACACG    |
|         | Cxcl9  | AATGCACGATGCTCCTGCA   | AGGTCTTTGAGGGATTTGTAGTG |
|         | Cxcl10 | AGTGCTG CCGTCATTTTCTG | TCCCTATGGCCCTCATTCTCA   |
|         | Cxcl11 | GTAATTTACCCGAGTAACGGC | CACCTTTGTCGTTTATGAGCCTT |
